# Supplementary material for: Conjunctival Microbiota in Patients With Type 2 Diabetes Mellitus and Influences of Perioperative Use of Topical Levofloxacin in Ocular Surgery
Source: PubMed Central journal article supplement (PMC8055849; doi:10.3389/fmed.2021.605639), 2021-04-06
Supplement: Image_1.pdf [file Image_1.pdf]

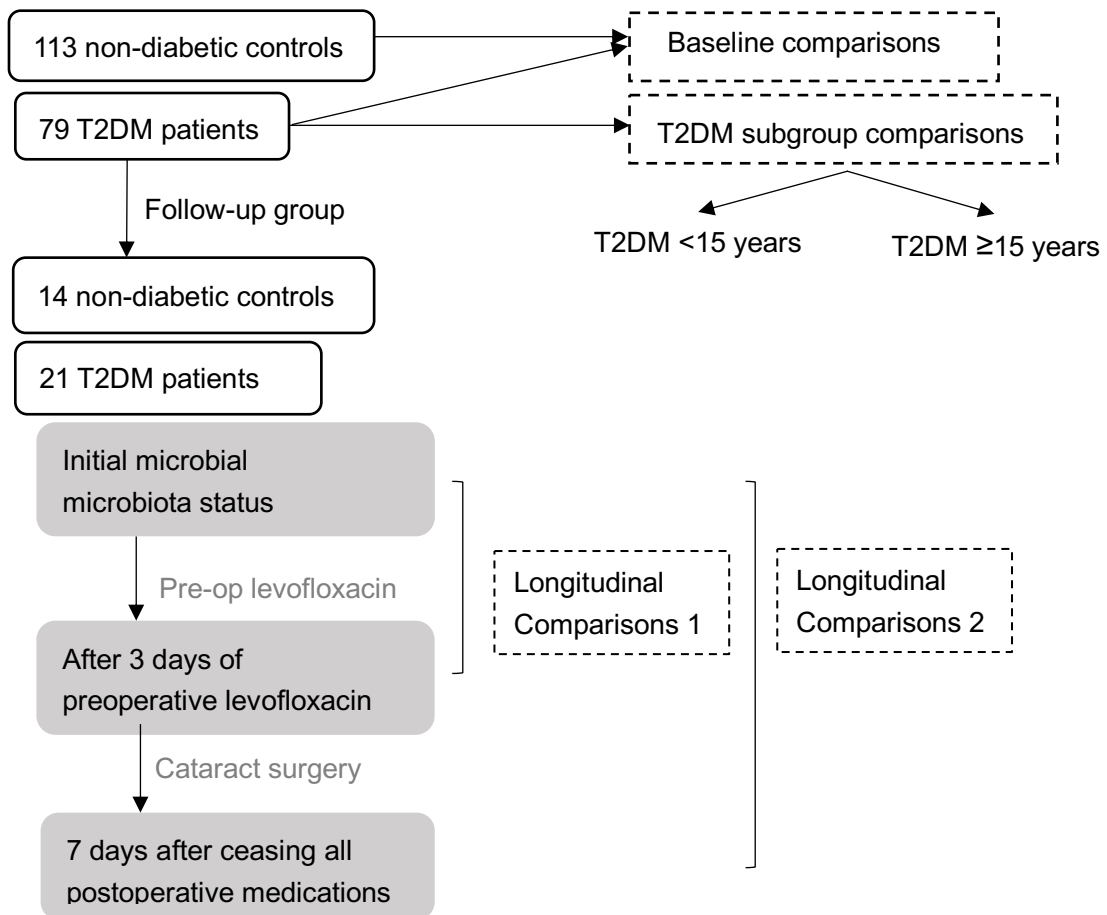

**Supplementary Figure S1.** The flow diagram of the study.
